# Supplementary material for: Binding and Efficacy of Anti-Robo4 CAR-T Cells against Solid Tumors
Source: MDPI journal article supplement (doi:10.3390/biomedicines10061273), 2022-05-30
Supplement: s1 [file s1]

Table S1 The amino acid sequence of anti-Robo4 scFv

| CAR ID | Clone | Sequence       |            |            |            |               |
|--------|-------|----------------|------------|------------|------------|---------------|
| CAR1   | R-13  | V <sub>H</sub> | EVQLVESGGG | LVKPGGSLKL | SCAASGFTFS | SYAMSWVRQT    |
|        |       |                | PEKRLEWVAT | ISSGGSYTTY | PDSVKGRFTI | SRDNAKNTLY    |
|        |       |                | LQMSSLRSED | TAMYICARND | YGYDFDYWGQ | GTTTLTVSS     |
|        |       | V <sub>L</sub> | DIVMTQSPAI | MSASPGKVT  | MTCSASSSVS | YMHWFQQKSG    |
|        |       |                | TSPKRWIYDT | SKLASGVPAR | FSGSGSGTSY | SLTISSMEAE    |
|        |       |                | DAATYYCQQW | SSNPPTFGGG | TKLELKR    |               |
| CAR2   | R-14  | V <sub>H</sub> | EVQLVESGGG | LVKPGGSLKL | SCAASGFTFS | SYAMSWVRQT    |
|        |       |                | PEKRLEWVAT | ISSGGSYTTY | PDSVKGRFTI | SRDNAKNNLY    |
|        |       |                | LQMSSLKSED | TAMYICARDS | HYRSRGYYFD | YWGQGTTLTV SS |
|        |       | V <sub>L</sub> | DIVMTQSPAI | MSASPGKVT  | ITCSASSSVS | YMHWFQQKSG    |
|        |       |                | TSPKLWIYST | SNLASGVPAR | FSGSGSGTSY | SLTISSMEAE    |
|        |       |                | DAATYYCQQW | SSNPPTFGGG | TKLELKR    |               |
| CAR3   | R-18  | V <sub>H</sub> | QVQLQQSGAE | LVRPGTSVKI | SCKASGYTFT | NYWLGWVKQR    |
|        |       |                | PGHGLEWIGD | IYPGGGYTNY | NEKFKGKATL | TADTSSSTAY    |
|        |       |                | MQLSSLTSED | SAVYFCAREG | LRRGDYWGQG | TTVTVSS       |
|        |       | V <sub>L</sub> | DIVMTQSPAI | MSASPGKVT  | MTCSASSSVS | YMHWFQQKSG    |
|        |       |                | TSPKRWIYDT | SKLASGVPAR | FSGSGSGTSY | SLTISSMEAE    |
|        |       |                | DAATYYCQQW | SSNPPTFGGG | TKLELKR    |               |

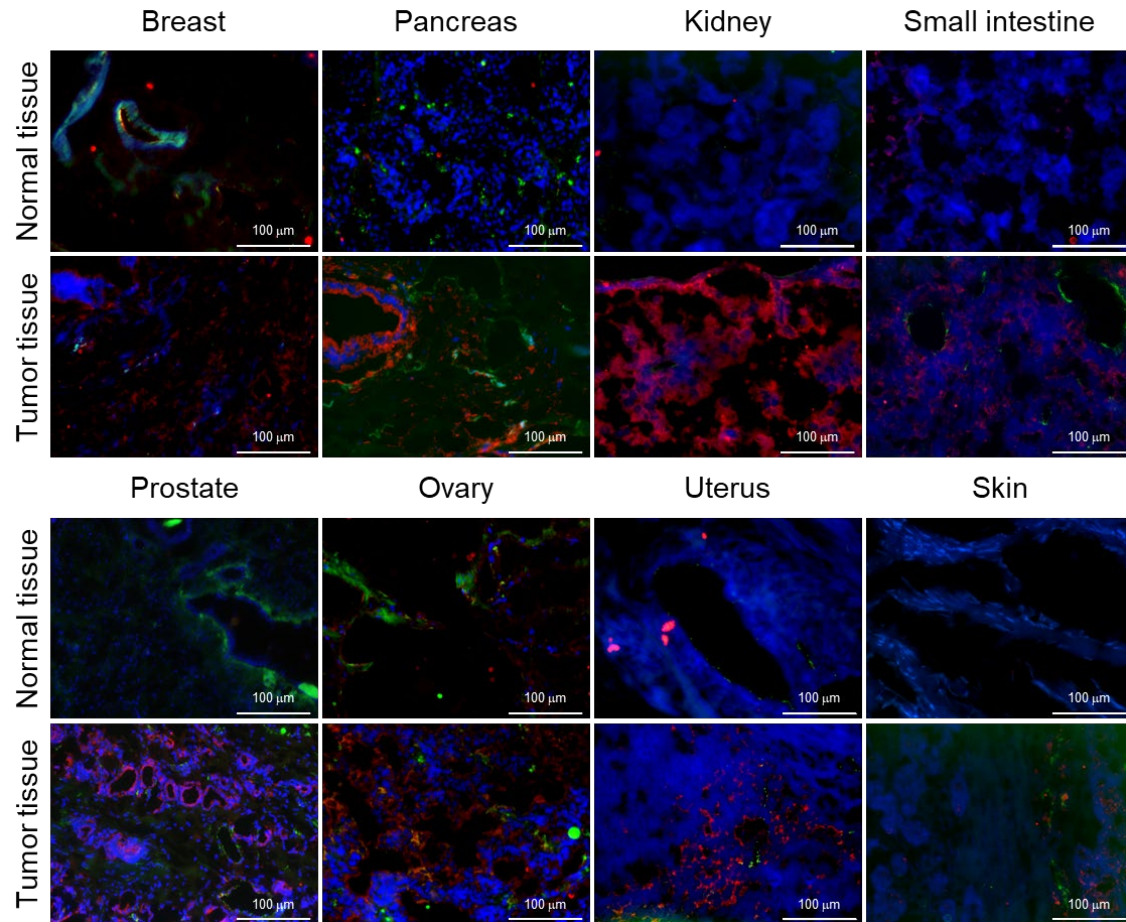

**Figure S1.** Expression of Robo4 in normal and tumor tissue using human tissue array. The rabbit anti-Robo4 antibody was synthesized by Syd Labs (Boston, MA, USA) based on the scFv of cloneR-14. The human Frozen Tumor and Normal Tissue Array (BioChain, Newark, CA, USA) was added with antibody dilution buffer containing anti-Robo4 antibody and mouse anti-human CD31 antibody (Clone WM59, BioLegend) and incubated at 4°C overnight. After removing the antibody solution, washing thoroughly with Tris-buffered saline containing 0.05% Tween-20, goat anti-mouse IgG highly cross-adsorbed secondary antibody, Alexa Fluor 488 (Thermo Fisher Scientific) and goat anti-rabbit IgG highly cross-adsorbed secondary antibody, Alexa Fluor 647 (Thermo Fisher Scientific) was added and incubated at room temperature for 2 h. After removing the antibody solution, plates were thoroughly washed with Tris-buffered saline containing 0.05% Tween-20 and mounted using ProLong Diamond Antifade Mountant with DAPI (Thermo Fisher Scientific). Fluorescence micrographs were acquired using a BZ-X800 microscope (Keyence). Representative images of immunofluorescence were shown with anti-Robo4 antibody (red), anti-CD31 antibody (green), and DAPI (blue).
